# Supplementary material
Source: MDPI journal article supplement (https://www.mdpi.com/2071-1050/13/20/11543)
Supplement: s1 [file s1]

# Identification of the dominant factors in groundwater recharge process, using Multivariate Statistical Approaches in a semi-arid region

José Luis Uc Castillo, José Alfredo Ramos Leal, Diego Armando Martínez Cruz, Ulises Rodríguez Robles, Adrián Cervantes  
Martínez and Ana Elizabeth Marín Celestino\*

**Table S1.** Thornthwaite method for the PET estimation [1]

---

First step, monthly heat index calculation

$$i = (t/5)^{1.514}$$

Obtaining the annual heat index (I) as the sum of the 12 values from the monthly heat index for theoretical months with 30 days and 12 hours sun

From these data he proposes the following formula

$$PET_0 = 16 \cdot (10 \cdot t / I)^a$$

where

PET<sub>0</sub>= Uncorrected monthly potential evapotranspiration

t = average monthly temperature

I = annual heat index

$$a = 675 \times 10^{-9} \cdot I^3 - 771 \times 10^{-7} \cdot I^2 + 1792 \times 10^{-5} \cdot I + 0.49239$$

The ETP values obtained have to be corrected according to the duration of the month and the number of hours of theoretical sunshine, variable in relation to the latitude of the meteorological station that supplied the data:

$$PET = PET_0 \cdot N/12 \cdot d/30$$

where

PET= monthly potential evapotranspiration

PET<sub>0</sub>= Uncorrected monthly potential evapotranspiration

N = number of sunshine hours for a specific day

d = number of days per month

---

**Table S2.** Runoff coefficient of Prevert (1984) [2]

| Land use    | Slope (%) | Texture |        |      |
|-------------|-----------|---------|--------|------|
|             |           | Coarse  | Medium | Fine |
| Forest      | 0-5       | 0.10    | 0.30   | 0.40 |
|             | 5-10      | 0.25    | 0.36   | 0.50 |
|             | 10-30     | 0.30    | 0.40   | 0.60 |
|             | >30       | 0.32    | 0.42   | 0.63 |
| Grassland   | 0-5       | 0.15    | 0.35   | 0.45 |
|             | 5-10      | 0.30    | 0.40   | 0.55 |
|             | 10-30     | 0.35    | 0.45   | 0.65 |
|             | >30       | 0.37    | 0.47   | 0.68 |
| Agriculture | 0-5       | 0.30    | 0.50   | 0.60 |
|             | 5-10      | 0.40    | 0.66   | 0.70 |
|             | 10-30     | 0.50    | 0.70   | 0.80 |
|             | >30       | 0.53    | 0.74   | 0.84 |

**Table S3.** Runoff coefficient of Chow (1993) [3]

| Land use   | Slope (%) | Texture |        |      |
|------------|-----------|---------|--------|------|
|            |           | Coarse  | Medium | Fine |
| Urban area | 0-5       | 0.70    | 0.81   | 0.92 |
|            | 5-10      | 0.76    | 0.85   | 0.93 |
|            | 10-30     | 0.88    | 0.91   | 0.94 |
|            | >30       | 0.95    | 0.95   | 0.95 |

**Table S4.** Results of the KMO test [4–6]

| Variables          | KMO         |
|--------------------|-------------|
|                    | MSA         |
| Altitude           | 0.60        |
| Slope              | 0.74        |
| Temperature        | 0.82        |
| Soil               | 0.69        |
| Vegetation         | 0.38        |
| Rainfall           | 0.71        |
| Relative humidity  | 0.84        |
| PET                | 0.81        |
| Land use           | 0.83        |
| Runoff coefficient | 0.38        |
| <i>K</i>           | 0.79        |
| Geology            | 0.84        |
| <b>Overall</b>     | <b>0.77</b> |

**Table S5.** Results of the Shapiro-Wilk test [7]

| Variable           | Shapiro-Wilk |                        |
|--------------------|--------------|------------------------|
|                    | W            | <i>p-value</i>         |
| Altitude           | 0.814        | $1.1 \times 10^{-7}$   |
| Slope              | 0.611        | $6.22 \times 10^{-12}$ |
| Temperature        | 0.861        | $2.79 \times 10^{-6}$  |
| Soil               | 0.850        | $1.22 \times 10^{-6}$  |
| Vegetation         | 0.666        | $5.83 \times 10^{-11}$ |
| Rainfall           | 0.665        | $5.52 \times 10^{-11}$ |
| Relative humidity  | 0.803        | $5.78 \times 10^{-8}$  |
| PET                | 0.904        | $9.09 \times 10^{-5}$  |
| Land use           | 0.614        | $6.99 \times 10^{-12}$ |
| Runoff coefficient | 0.824        | $2.09 \times 10^{-7}$  |
| K                  | 0.701        | $2.76 \times 10^{-10}$ |
| Geology            | 0.805        | $6.52 \times 10^{-8}$  |

## References

1. Thornthwaite, C.W. An Approach toward a Rational Classification of Climate. *Geogr. Rev.* **1948**, *38*, 55–94.
2. Treviño-Garza, E.; Muñoz R., C.; Cavazos C., C.; Barajas-Chávez, L. Evaluación del flujo hídrico superficial en la Sierra de San Carlos, Tamaulipas. *Cienc. UANL* **2002**, *5*, 525–530.
3. Chow, J.C.; Watson, J.G.; Lowenthal, D.H.; Solomon, P.A.; Magliano, K.L.; Ziman, S.D.; Richards, L.W. PM10 and PM2.5 Compositions in California's San Joaquin Valley. *Aerosol Sci. Technol.* **1993**, *18*, 105–128, doi:10.1080/02786829308959588.
4. Marín-Celestino, A.E.; Martínez-Cruz, D.A.; Otazo-Sánchez, E.M.; Gavi-Reyes, F.; Vásquez-Soto, D. Groundwater quality assessment: An improved approach to K-means clustering, principal component analysis and spatial analysis: A case study. *Water (Switzerland)* **2018**, *10*, doi:10.3390/w10040437.
5. Marín-Celestino, A.E.; Ramos-Leal, J.A.; Martínez-Cruz, D.A.; Tuxpan-Vargas, J.; De Lara-Bashulto, J.; Morán-Ramírez, J. Identification of the Hydrogeochemical Processes and Assessment of Groundwater Quality, Using Multivariate Statistical Approaches and Water Quality Index in a Wastewater Irrigated Region. *Water* **2019**, *11*, 1–24, doi:10.3390/w11081702.
6. Sarmadi, F.; Shokoohi, A. Regionalizing precipitation in Iran using GPCC gridded data via multivariate analysis and L-moment methods. *Theor. Appl. Climatol.* **2015**, *122*, 121–128, doi:10.1007/s00704-014-1292-y.
7. Shapiro, S.S.; Wilk, M.B. An analysis of variance test for normality (complete samples). *Biometrika* **1965**, *52*, 591–611.
